# Supplementary material
Source: ML conference proceedings conference paper supplement (https://proceedings.neurips.cc/paper_files/paper/2022/hash/8e9a6582caa59fda0302349702965171-Abstract.html)
Supplement: Supplementary file 1 [file 8e9a6582caa59fda0302349702965171-Supplemental-Conference.zip]

Archive with 17 entries (11 files):
- Supplemental/
- Supplemental/2022_NeurIPS_HNA_appendix.pdf
- Supplemental/assets/
- Supplemental/assets/HNA.py
- Supplemental/assets/HNA_coco.tf/
- Supplemental/assets/HNA_coco.tf/keras_metadata.pb
- Supplemental/assets/HNA_coco.tf/saved_model.pb
- Supplemental/assets/HNA_coco.tf/variables/
- Supplemental/assets/HNA_coco.tf/variables/variables.data-00000-of-00001
- Supplemental/assets/HNA_coco.tf/variables/variables.index
- Supplemental/assets/HNA_mnist.tf/
- Supplemental/assets/HNA_mnist.tf/keras_metadata.pb
- Supplemental/assets/HNA_mnist.tf/saved_model.pb
- Supplemental/assets/HNA_mnist.tf/variables/
- Supplemental/assets/HNA_mnist.tf/variables/variables.data-00000-of-00001
- Supplemental/assets/HNA_mnist.tf/variables/variables.index
- Supplemental/HNA_demo.ipynb
