# Supplementary material
Source: ML conference proceedings conference paper supplement (https://proceedings.neurips.cc/paper_files/paper/2022/hash/8e9a6582caa59fda0302349702965171-Abstract.html)
Supplement: Supplementary file 1 [file 8e9a6582caa59fda0302349702965171-Supplemental-Conference.zip › Supplemental/assets/HNA_coco.tf/keras_metadata.pb]

þGroot"_tf_keras_network*ÜG{"name": "model_5", "trainable": true, "expects_training_arg": true, "dtype": "float32", "batch_input_shape": null, "must_restore_from_config": false, "class_name": "Functional", "config": {"name": "model_5", "layers": [{"class_name": "InputLayer", "config": {"batch_input_shape": {"class_name": "__tuple__", "items": [null, 12]}, "dtype": "float32", "sparse": false, "ragged": false, "name": "modelparams_input"}, "name": "modelparams_input", "inbound_nodes": []}, {"class_name": "InputLayer", "config": {"batch_input_shape": {"class_name": "__tuple__", "items": [null, 49, 49, 1]}, "dtype": "float32", "sparse": false, "ragged": false, "name": "input_3"}, "name": "input_3", "inbound_nodes": []}, {"class_name": "BatchNormalization", "config": {"name": "batch_normalization_4", "trainable": true, "dtype": "float32", "axis": [1], "momentum": 0.99, "epsilon": 0.001, "center": true, "scale": true, "beta_initializer": {"class_name": "Zeros", "config": {}}, "gamma_initializer": {"class_name": "Ones", "config": {}}, "moving_mean_initializer": {"class_name": "Zeros", "config": {}}, "moving_variance_initializer": {"class_name": "Ones", "config": {}}, "beta_regularizer": null, "gamma_regularizer": null, "beta_constraint": null, "gamma_constraint": null}, "name": "batch_normalization_4", "inbound_nodes": [[["modelparams_input", 0, 0, {}]]]}, {"class_name": "Flatten", "config": {"name": "flatten_2", "trainable": true, "dtype": "float32", "data_format": "channels_last"}, "name": "flatten_2", "inbound_nodes": [[["input_3", 0, 0, {}]]]}, {"class_name": "Dense", "config": {"name": "dense_9", "trainable": true, "dtype": "float32", "units": 300, "activation": "relu", "use_bias": true, "kernel_initializer": {"class_name": "GlorotUniform", "config": {"seed": null}}, "bias_initializer": {"class_name": "Zeros", "config": {}}, "kernel_regularizer": null, "bias_regularizer": null, "activity_regularizer": null, "kernel_constraint": null, "bias_constraint": null}, "name": "dense_9", "inbound_nodes": [[["batch_normalization_4", 0, 0, {}]]]}, {"class_name": "Dense", "config": {"name": "dense_8", "trainable": true, "dtype": "float32", "units": 400, "activation": {"class_name": "LeakyReLU", "config": {"name": "leaky_re_lu_1", "trainable": true, "dtype": "float32", "alpha": 0.30000001192092896}}, "use_bias": true, "kernel_initializer": {"class_name": "GlorotUniform", "config": {"seed": null}}, "bias_initializer": {"class_name": "Zeros", "config": {}}, "kernel_regularizer": null, "bias_regularizer": null, "activity_regularizer": null, "kernel_constraint": null, "bias_constraint": null}, "name": "dense_8", "inbound_nodes": [[["flatten_2", 0, 0, {}]]]}, {"class_name": "Dense", "config": {"name": "dense_10", "trainable": true, "dtype": "float32", "units": 100, "activation": "relu", "use_bias": true, "kernel_initializer": {"class_name": "GlorotUniform", "config": {"seed": null}}, "bias_initializer": {"class_name": "Zeros", "config": {}}, "kernel_regularizer": null, "bias_regularizer": null, "activity_regularizer": null, "kernel_constraint": null, "bias_constraint": null}, "name": "dense_10", "inbound_nodes": [[["dense_9", 0, 0, {}]]]}, {"class_name": "Concatenate", "config": {"name": "concatenate_4", "trainable": true, "dtype": "float32", "axis": -1}, "name": "concatenate_4", "inbound_nodes": [[["dense_8", 0, 0, {}], ["dense_10", 0, 0, {}]]]}, {"class_name": "Dense", "config": {"name": "dense_11", "trainable": true, "dtype": "float32", "units": 300, "activation": "relu", "use_bias": true, "kernel_initializer": {"class_name": "GlorotUniform", "config": {"seed": null}}, "bias_initializer": {"class_name": "Zeros", "config": {}}, "kernel_regularizer": null, "bias_regularizer": null, "activity_regularizer": null, "kernel_constraint": null, "bias_constraint": null}, "name": "dense_11", "inbound_nodes": [[["concatenate_4", 0, 0, {}]]]}, {"class_name": "Dense", "config": {"name": "dense_12", "trainable": true, "dtype": "float32", "units": 225, "activation": "relu", "use_bias": true, "kernel_initializer": {"class_name": "GlorotUniform", "config": {"seed": null}}, "bias_initializer": {"class_name": "Zeros", "config": {}}, "kernel_regularizer": null, "bias_regularizer": null, "activity_regularizer": null, "kernel_constraint": null, "bias_constraint": null}, "name": "dense_12", "inbound_nodes": [[["dense_11", 0, 0, {}]]]}, {"class_name": "TFOpLambda", "config": {"name": "tf.math.multiply_4", "trainable": true, "dtype": "float32", "function": "math.multiply"}, "name": "tf.math.multiply_4", "inbound_nodes": [["dense_12", 0, 0, {"y": 2, "name": null}]]}, {"class_name": "Concatenate", "config": {"name": "concatenate_5", "trainable": true, "dtype": "float32", "axis": -1}, "name": "concatenate_5", "inbound_nodes": [[["tf.math.multiply_4", 0, 0, {}], ["dense_11", 0, 0, {}]]]}, {"class_name": "BatchNormalization", "config": {"name": "batch_normalization_5", "trainable": true, "dtype": "float32", "axis": [1], "momentum": 0.99, "epsilon": 0.001, "center": true, "scale": true, "beta_initializer": {"class_name": "Zeros", "config": {}}, "gamma_initializer": {"class_name": "Ones", "config": {}}, "moving_mean_initializer": {"class_name": "Zeros", "config": {}}, "moving_variance_initializer": {"class_name": "Ones", "config": {}}, "beta_regularizer": null, "gamma_regularizer": null, "beta_constraint": null, "gamma_constraint": null}, "name": "batch_normalization_5", "inbound_nodes": [[["concatenate_5", 0, 0, {}]]]}, {"class_name": "Dense", "config": {"name": "dense_13", "trainable": true, "dtype": "float32", "units": 225, "activation": "relu", "use_bias": true, "kernel_initializer": {"class_name": "GlorotUniform", "config": {"seed": null}}, "bias_initializer": {"class_name": "Zeros", "config": {}}, "kernel_regularizer": null, "bias_regularizer": null, "activity_regularizer": null, "kernel_constraint": null, "bias_constraint": null}, "name": "dense_13", "inbound_nodes": [[["batch_normalization_5", 0, 0, {}]]]}, {"class_name": "Dense", "config": {"name": "dense_14", "trainable": true, "dtype": "float32", "units": 225, "activation": "relu", "use_bias": true, "kernel_initializer": {"class_name": "GlorotUniform", "config": {"seed": null}}, "bias_initializer": {"class_name": "Zeros", "config": {}}, "kernel_regularizer": null, "bias_regularizer": null, "activity_regularizer": null, "kernel_constraint": null, "bias_constraint": null}, "name": "dense_14", "inbound_nodes": [[["batch_normalization_5", 0, 0, {}]]]}, {"class_name": "TFOpLambda", "config": {"name": "tf.math.multiply_5", "trainable": true, "dtype": "float32", "function": "math.multiply"}, "name": "tf.math.multiply_5", "inbound_nodes": [["dense_13", 0, 0, {"y": 20, "name": null}]]}, {"class_name": "TFOpLambda", "config": {"name": "tf.__operators__.add_2", "trainable": true, "dtype": "float32", "function": "__operators__.add"}, "name": "tf.__operators__.add_2", "inbound_nodes": [["dense_14", 0, 0, {"y": 0.001, "name": null}]]}, {"class_name": "Lambda", "config": {"name": "stims", "trainable": true, "dtype": "float32", "function": {"class_name": "__tuple__", "items": ["4wEAAAAAAAAAAAAAAAEAAAAEAAAAQwAAAHMOAAAAdABqAXwAZAFkAo0CUwApA07p/////ykB2gRh\neGlzKQLaAnRm2gVzdGFjaykB2gF4qQByBgAAAHojL3RtcC9pcHlrZXJuZWxfMTAxNDU3LzE2MDUx\nMDkyNjQucHnaCDxsYW1iZGE+EwAAAPMAAAAA\n", null, null]}, "function_type": "lambda", "module": "__main__", "output_shape": null, "output_shape_type": "raw", "output_shape_module": null, "arguments": {}}, "name": "stims", "inbound_nodes": [[["tf.math.multiply_5", 0, 0, {}], ["tf.math.multiply_4", 0, 0, {}], ["tf.__operators__.add_2", 0, 0, {}]]]}, {"class_name": "UniversalBiphasicAxonMapLayer", "config": {"layer was saved without config": true}, "name": "UniversalBiphasicAxonMap", "inbound_nodes": [[["stims", 0, 0, {}], ["modelparams_input", 0, 0, {}]]]}], "input_layers": [["input_3", 0, 0], ["modelparams_input", 0, 0]], "output_layers": [["UniversalBiphasicAxonMap", 0, 0]]}, "shared_object_id": 41, "input_spec": [{"class_name": "InputSpec", "config": {"dtype": null, "shape": {"class_name": "__tuple__", "items": [null, 49, 49, 1]}, "ndim": 4, "max_ndim": null, "min_ndim": null, "axes": {}}}, {"class_name": "InputSpec", "config": {"dtype": null, "shape": {"class_name": "__tuple__", "items": [null, 12]}, "ndim": 2, "max_ndim": null, "min_ndim": null, "axes": {}}}], "build_input_shape": [{"class_name": "TensorShape", "items": [null, 49, 49, 1]}, {"class_name": "TensorShape", "items": [null, 12]}], "is_graph_network": true, "save_spec": [{"class_name": "TypeSpec", "type_spec": "tf.TensorSpec", "serialized": [{"class_name": "TensorShape", "items": [null, 49, 49, 1]}, "float32", "input_3"]}, {"class_name": "TypeSpec", "type_spec": "tf.TensorSpec", "serialized": [{"class_name": "TensorShape", "items": [null, 12]}, "float32", "modelparams_input"]}], "keras_version": "2.6.0", "backend": "tensorflow", "model_config": {"class_name": "Functional"}, "training_config": {"loss": "mae", "metrics": null, "weighted_metrics": null, "loss_weights": null, "optimizer_config": {"class_name": "RMSprop", "config": {"name": "RMSprop", "learning_rate": 0.001, "decay": 0.0, "rho": 0.9, "momentum": 0.0, "epsilon": 1e-07, "centered": false}}}}2
root.layer-0"_tf_keras_input_layer*Ü{"class_name": "InputLayer", "name": "modelparams_input", "dtype": "float32", "sparse": false, "ragged": false, "batch_input_shape": {"class_name": "__tuple__", "items": [null, 12]}, "config": {"batch_input_shape": {"class_name": "__tuple__", "items": [null, 12]}, "dtype": "float32", "sparse": false, "ragged": false, "name": "modelparams_input"}}2
root.layer-1"_tf_keras_input_layer*Ö{"class_name": "InputLayer", "name": "input_3", "dtype": "float32", "sparse": false, "ragged": false, "batch_input_shape": {"class_name": "__tuple__", "items": [null, 49, 49, 1]}, "config": {"batch_input_shape": {"class_name": "__tuple__", "items": [null, 49, 49, 1]}, "dtype": "float32", "sparse": false, "ragged": false, "name": "input_3"}}2
¼	root.layer_with_weights-0"_tf_keras_layer*	{"name": "batch_normalization_4", "trainable": true, "expects_training_arg": true, "dtype": "float32", "batch_input_shape": null, "stateful": false, "must_restore_from_config": false, "class_name": "BatchNormalization", "config": {"name": "batch_normalization_4", "trainable": true, "dtype": "float32", "axis": [1], "momentum": 0.99, "epsilon": 0.001, "center": true, "scale": true, "beta_initializer": {"class_name": "Zeros", "config": {}, "shared_object_id": 2}, "gamma_initializer": {"class_name": "Ones", "config": {}, "shared_object_id": 3}, "moving_mean_initializer": {"class_name": "Zeros", "config": {}, "shared_object_id": 4}, "moving_variance_initializer": {"class_name": "Ones", "config": {}, "shared_object_id": 5}, "beta_regularizer": null, "gamma_regularizer": null, "beta_constraint": null, "gamma_constraint": null}, "inbound_nodes": [[["modelparams_input", 0, 0, {}]]], "shared_object_id": 6, "input_spec": {"class_name": "InputSpec", "config": {"dtype": null, "shape": null, "ndim": 2, "max_ndim": null, "min_ndim": null, "axes": {"1": 12}}, "shared_object_id": 44}, "build_input_shape": {"class_name": "TensorShape", "items": [null, 12]}}2
Âroot.layer-3"_tf_keras_layer*{"name": "flatten_2", "trainable": true, "expects_training_arg": false, "dtype": "float32", "batch_input_shape": null, "stateful": false, "must_restore_from_config": false, "class_name": "Flatten", "config": {"name": "flatten_2", "trainable": true, "dtype": "float32", "data_format": "channels_last"}, "inbound_nodes": [[["input_3", 0, 0, {}]]], "shared_object_id": 7, "input_spec": {"class_name": "InputSpec", "config": {"dtype": null, "shape": null, "ndim": null, "max_ndim": null, "min_ndim": 1, "axes": {}}, "shared_object_id": 45}}2
root.layer_with_weights-1"_tf_keras_layer*Ê{"name": "dense_9", "trainable": true, "expects_training_arg": false, "dtype": "float32", "batch_input_shape": null, "stateful": false, "must_restore_from_config": false, "class_name": "Dense", "config": {"name": "dense_9", "trainable": true, "dtype": "float32", "units": 300, "activation": "relu", "use_bias": true, "kernel_initializer": {"class_name": "GlorotUniform", "config": {"seed": null}, "shared_object_id": 8}, "bias_initializer": {"class_name": "Zeros", "config": {}, "shared_object_id": 9}, "kernel_regularizer": null, "bias_regularizer": null, "activity_regularizer": null, "kernel_constraint": null, "bias_constraint": null}, "inbound_nodes": [[["batch_normalization_4", 0, 0, {}]]], "shared_object_id": 10, "input_spec": {"class_name": "InputSpec", "config": {"dtype": null, "shape": null, "ndim": null, "max_ndim": null, "min_ndim": 2, "axes": {"-1": 12}}, "shared_object_id": 46}, "build_input_shape": {"class_name": "TensorShape", "items": [null, 12]}}2
	root.layer_with_weights-2"_tf_keras_layer*Û{"name": "dense_8", "trainable": true, "expects_training_arg": false, "dtype": "float32", "batch_input_shape": null, "stateful": false, "must_restore_from_config": false, "class_name": "Dense", "config": {"name": "dense_8", "trainable": true, "dtype": "float32", "units": 400, "activation": {"class_name": "LeakyReLU", "config": {"name": "leaky_re_lu_1", "trainable": true, "dtype": "float32", "alpha": 0.30000001192092896}, "shared_object_id": 11}, "use_bias": true, "kernel_initializer": {"class_name": "GlorotUniform", "config": {"seed": null}, "shared_object_id": 12}, "bias_initializer": {"class_name": "Zeros", "config": {}, "shared_object_id": 13}, "kernel_regularizer": null, "bias_regularizer": null, "activity_regularizer": null, "kernel_constraint": null, "bias_constraint": null}, "inbound_nodes": [[["flatten_2", 0, 0, {}]]], "shared_object_id": 14, "input_spec": {"class_name": "InputSpec", "config": {"dtype": null, "shape": null, "ndim": null, "max_ndim": null, "min_ndim": 2, "axes": {"-1": 2401}}, "shared_object_id": 47}, "build_input_shape": {"class_name": "TensorShape", "items": [null, 2401]}}2
ùroot.layer_with_weights-3"_tf_keras_layer*Â{"name": "dense_10", "trainable": true, "expects_training_arg": false, "dtype": "float32", "batch_input_shape": null, "stateful": false, "must_restore_from_config": false, "class_name": "Dense", "config": {"name": "dense_10", "trainable": true, "dtype": "float32", "units": 100, "activation": "relu", "use_bias": true, "kernel_initializer": {"class_name": "GlorotUniform", "config": {"seed": null}, "shared_object_id": 15}, "bias_initializer": {"class_name": "Zeros", "config": {}, "shared_object_id": 16}, "kernel_regularizer": null, "bias_regularizer": null, "activity_regularizer": null, "kernel_constraint": null, "bias_constraint": null}, "inbound_nodes": [[["dense_9", 0, 0, {}]]], "shared_object_id": 17, "input_spec": {"class_name": "InputSpec", "config": {"dtype": null, "shape": null, "ndim": null, "max_ndim": null, "min_ndim": 2, "axes": {"-1": 300}}, "shared_object_id": 48}, "build_input_shape": {"class_name": "TensorShape", "items": [null, 300]}}2
¬root.layer-7"_tf_keras_layer*{"name": "concatenate_4", "trainable": true, "expects_training_arg": false, "dtype": "float32", "batch_input_shape": null, "stateful": false, "must_restore_from_config": false, "class_name": "Concatenate", "config": {"name": "concatenate_4", "trainable": true, "dtype": "float32", "axis": -1}, "inbound_nodes": [[["dense_8", 0, 0, {}], ["dense_10", 0, 0, {}]]], "shared_object_id": 18, "build_input_shape": [{"class_name": "TensorShape", "items": [null, 400]}, {"class_name": "TensorShape", "items": [null, 100]}]}2
ÿ	root.layer_with_weights-4"_tf_keras_layer*È{"name": "dense_11", "trainable": true, "expects_training_arg": false, "dtype": "float32", "batch_input_shape": null, "stateful": false, "must_restore_from_config": false, "class_name": "Dense", "config": {"name": "dense_11", "trainable": true, "dtype": "float32", "units": 300, "activation": "relu", "use_bias": true, "kernel_initializer": {"class_name": "GlorotUniform", "config": {"seed": null}, "shared_object_id": 19}, "bias_initializer": {"class_name": "Zeros", "config": {}, "shared_object_id": 20}, "kernel_regularizer": null, "bias_regularizer": null, "activity_regularizer": null, "kernel_constraint": null, "bias_constraint": null}, "inbound_nodes": [[["concatenate_4", 0, 0, {}]]], "shared_object_id": 21, "input_spec": {"class_name": "InputSpec", "config": {"dtype": null, "shape": null, "ndim": null, "max_ndim": null, "min_ndim": 2, "axes": {"-1": 500}}, "shared_object_id": 49}, "build_input_shape": {"class_name": "TensorShape", "items": [null, 500]}}2
ú
root.layer_with_weights-5"_tf_keras_layer*Ã{"name": "dense_12", "trainable": true, "expects_training_arg": false, "dtype": "float32", "batch_input_shape": null, "stateful": false, "must_restore_from_config": false, "class_name": "Dense", "config": {"name": "dense_12", "trainable": true, "dtype": "float32", "units": 225, "activation": "relu", "use_bias": true, "kernel_initializer": {"class_name": "GlorotUniform", "config": {"seed": null}, "shared_object_id": 22}, "bias_initializer": {"class_name": "Zeros", "config": {}, "shared_object_id": 23}, "kernel_regularizer": null, "bias_regularizer": null, "activity_regularizer": null, "kernel_constraint": null, "bias_constraint": null}, "inbound_nodes": [[["dense_11", 0, 0, {}]]], "shared_object_id": 24, "input_spec": {"class_name": "InputSpec", "config": {"dtype": null, "shape": null, "ndim": null, "max_ndim": null, "min_ndim": 2, "axes": {"-1": 300}}, "shared_object_id": 50}, "build_input_shape": {"class_name": "TensorShape", "items": [null, 300]}}2
À
root.layer-10"_tf_keras_layer*{"name": "tf.math.multiply_4", "trainable": true, "expects_training_arg": false, "dtype": "float32", "batch_input_shape": null, "stateful": false, "must_restore_from_config": true, "class_name": "TFOpLambda", "config": {"name": "tf.math.multiply_4", "trainable": true, "dtype": "float32", "function": "math.multiply"}, "inbound_nodes": [["dense_12", 0, 0, {"y": 2, "name": null}]], "shared_object_id": 25}2
¸
root.layer-11"_tf_keras_layer*{"name": "concatenate_5", "trainable": true, "expects_training_arg": false, "dtype": "float32", "batch_input_shape": null, "stateful": false, "must_restore_from_config": false, "class_name": "Concatenate", "config": {"name": "concatenate_5", "trainable": true, "dtype": "float32", "axis": -1}, "inbound_nodes": [[["tf.math.multiply_4", 0, 0, {}], ["dense_11", 0, 0, {}]]], "shared_object_id": 26, "build_input_shape": [{"class_name": "TensorShape", "items": [null, 225]}, {"class_name": "TensorShape", "items": [null, 300]}]}2
¿	
root.layer_with_weights-6"_tf_keras_layer*	{"name": "batch_normalization_5", "trainable": true, "expects_training_arg": true, "dtype": "float32", "batch_input_shape": null, "stateful": false, "must_restore_from_config": false, "class_name": "BatchNormalization", "config": {"name": "batch_normalization_5", "trainable": true, "dtype": "float32", "axis": [1], "momentum": 0.99, "epsilon": 0.001, "center": true, "scale": true, "beta_initializer": {"class_name": "Zeros", "config": {}, "shared_object_id": 27}, "gamma_initializer": {"class_name": "Ones", "config": {}, "shared_object_id": 28}, "moving_mean_initializer": {"class_name": "Zeros", "config": {}, "shared_object_id": 29}, "moving_variance_initializer": {"class_name": "Ones", "config": {}, "shared_object_id": 30}, "beta_regularizer": null, "gamma_regularizer": null, "beta_constraint": null, "gamma_constraint": null}, "inbound_nodes": [[["concatenate_5", 0, 0, {}]]], "shared_object_id": 31, "input_spec": {"class_name": "InputSpec", "config": {"dtype": null, "shape": null, "ndim": 2, "max_ndim": null, "min_ndim": null, "axes": {"1": 525}}, "shared_object_id": 51}, "build_input_shape": {"class_name": "TensorShape", "items": [null, 525]}}2
root.layer_with_weights-7"_tf_keras_layer*Ð{"name": "dense_13", "trainable": true, "expects_training_arg": false, "dtype": "float32", "batch_input_shape": null, "stateful": false, "must_restore_from_config": false, "class_name": "Dense", "config": {"name": "dense_13", "trainable": true, "dtype": "float32", "units": 225, "activation": "relu", "use_bias": true, "kernel_initializer": {"class_name": "GlorotUniform", "config": {"seed": null}, "shared_object_id": 32}, "bias_initializer": {"class_name": "Zeros", "config": {}, "shared_object_id": 33}, "kernel_regularizer": null, "bias_regularizer": null, "activity_regularizer": null, "kernel_constraint": null, "bias_constraint": null}, "inbound_nodes": [[["batch_normalization_5", 0, 0, {}]]], "shared_object_id": 34, "input_spec": {"class_name": "InputSpec", "config": {"dtype": null, "shape": null, "ndim": null, "max_ndim": null, "min_ndim": 2, "axes": {"-1": 525}}, "shared_object_id": 52}, "build_input_shape": {"class_name": "TensorShape", "items": [null, 525]}}2
root.layer_with_weights-8"_tf_keras_layer*Ð{"name": "dense_14", "trainable": true, "expects_training_arg": false, "dtype": "float32", "batch_input_shape": null, "stateful": false, "must_restore_from_config": false, "class_name": "Dense", "config": {"name": "dense_14", "trainable": true, "dtype": "float32", "units": 225, "activation": "relu", "use_bias": true, "kernel_initializer": {"class_name": "GlorotUniform", "config": {"seed": null}, "shared_object_id": 35}, "bias_initializer": {"class_name": "Zeros", "config": {}, "shared_object_id": 36}, "kernel_regularizer": null, "bias_regularizer": null, "activity_regularizer": null, "kernel_constraint": null, "bias_constraint": null}, "inbound_nodes": [[["batch_normalization_5", 0, 0, {}]]], "shared_object_id": 37, "input_spec": {"class_name": "InputSpec", "config": {"dtype": null, "shape": null, "ndim": null, "max_ndim": null, "min_ndim": 2, "axes": {"-1": 525}}, "shared_object_id": 53}, "build_input_shape": {"class_name": "TensorShape", "items": [null, 525]}}2
Á
root.layer-15"_tf_keras_layer*{"name": "tf.math.multiply_5", "trainable": true, "expects_training_arg": false, "dtype": "float32", "batch_input_shape": null, "stateful": false, "must_restore_from_config": true, "class_name": "TFOpLambda", "config": {"name": "tf.math.multiply_5", "trainable": true, "dtype": "float32", "function": "math.multiply"}, "inbound_nodes": [["dense_13", 0, 0, {"y": 20, "name": null}]], "shared_object_id": 38}2
Ð
root.layer-16"_tf_keras_layer*¥{"name": "tf.__operators__.add_2", "trainable": true, "expects_training_arg": false, "dtype": "float32", "batch_input_shape": null, "stateful": false, "must_restore_from_config": true, "class_name": "TFOpLambda", "config": {"name": "tf.__operators__.add_2", "trainable": true, "dtype": "float32", "function": "__operators__.add"}, "inbound_nodes": [["dense_14", 0, 0, {"y": 0.001, "name": null}]], "shared_object_id": 39}2
Ü
root.layer-17"_tf_keras_layer*±{"name": "stims", "trainable": true, "expects_training_arg": true, "dtype": "float32", "batch_input_shape": null, "stateful": false, "must_restore_from_config": false, "class_name": "Lambda", "config": {"name": "stims", "trainable": true, "dtype": "float32", "function": {"class_name": "__tuple__", "items": ["4wEAAAAAAAAAAAAAAAEAAAAEAAAAQwAAAHMOAAAAdABqAXwAZAFkAo0CUwApA07p/////ykB2gRh\neGlzKQLaAnRm2gVzdGFjaykB2gF4qQByBgAAAHojL3RtcC9pcHlrZXJuZWxfMTAxNDU3LzE2MDUx\nMDkyNjQucHnaCDxsYW1iZGE+EwAAAPMAAAAA\n", null, null]}, "function_type": "lambda", "module": "__main__", "output_shape": null, "output_shape_type": "raw", "output_shape_module": null, "arguments": {}}, "inbound_nodes": [[["tf.math.multiply_5", 0, 0, {}], ["tf.math.multiply_4", 0, 0, {}], ["tf.__operators__.add_2", 0, 0, {}]]], "shared_object_id": 40}2
Ê
root.layer-18"_tf_keras_layer*{"name": "UniversalBiphasicAxonMap", "trainable": false, "expects_training_arg": false, "dtype": "float32", "batch_input_shape": null, "stateful": false, "must_restore_from_config": false, "class_name": "UniversalBiphasicAxonMapLayer", "config": {"layer was saved without config": true}}2
3$root.layer_with_weights-2.activation"_tf_keras_layer*Í{"name": "leaky_re_lu_1", "trainable": true, "expects_training_arg": false, "dtype": "float32", "batch_input_shape": null, "stateful": false, "must_restore_from_config": false, "class_name": "LeakyReLU", "config": {"name": "leaky_re_lu_1", "trainable": true, "dtype": "float32", "alpha": 0.30000001192092896}, "shared_object_id": 11}2
ºÒroot.keras_api.metrics.0"_tf_keras_metric*{"class_name": "Mean", "name": "loss", "dtype": "float32", "config": {"name": "loss", "dtype": "float32"}, "shared_object_id": 54}2
